# Supplementary material for: Genotyping by sequencing reveals the interspecific C. maxima / C. reticulata admixture along the genomes of modern citrus varieties of mandarins, tangors, tangelos, orangelos and grapefruits
Source: PLOS journal article supplement (doi:10.1371/journal.pone.0185618), 2017-10-05

Amel Oueslati, Amel Salhi-Hannachi, François Luro, Hélène Vignes, Pierre Mournet and Patrick Ollitrault. Genotyping By Sequencing reveal the interspecific *C. maxima* / *C. reticulata* admixture along the genomes of modern citrus varieties of mandarins, tangors, tangelos, orangelos and grapefruits. Plos One (submitted)

\_\_\_\_\_

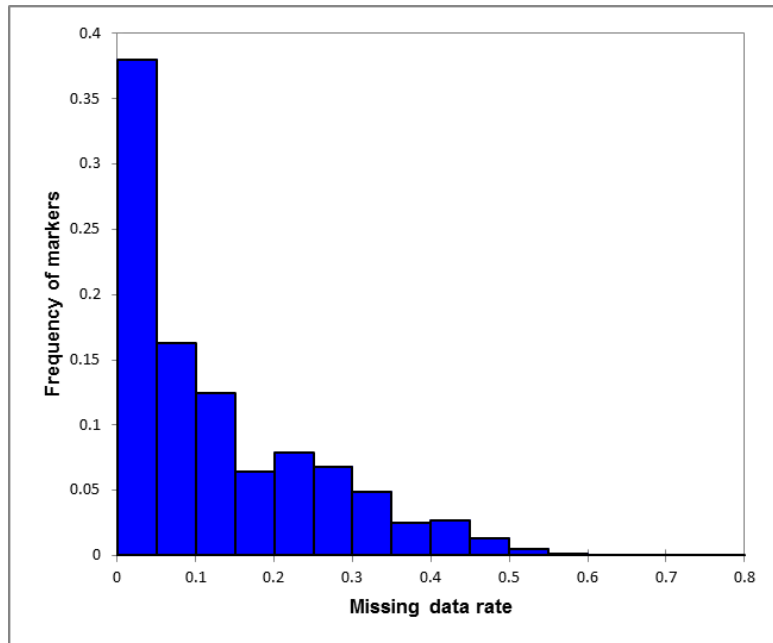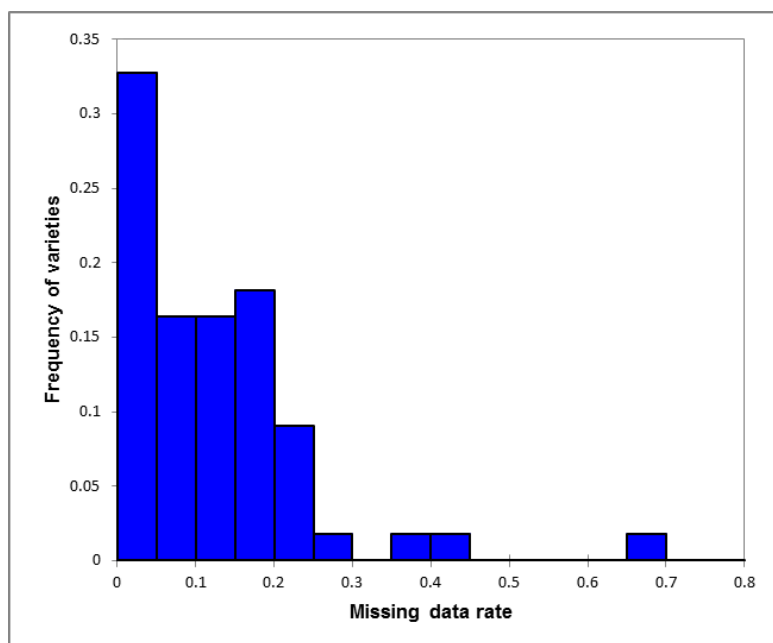

Supplement: S1 (10.1371/journal.pone.0185618.s001) [file redirect.do]
